# Supplementary material for: Improved Resolution of 4-Chloromandelic Acid and the Effect of Chlorine Interactions Using (R)-(+)-Benzyl-1-Phenylethylamine as a Resolving Agent
Source: MDPI journal article supplement (doi:10.3390/molecules23123354), 2018-12-18
Supplement: s1 [file s1]

# Improved Resolution of 4-Chloromandelic Acid and the Effect of Chlorine Interactions Using (R)-(+)-Benzyl-1-Phenylethylamine as a Resolving Agent

Yangfeng Peng <sup>1,\*</sup>, Cai Feng <sup>1</sup>, Sohrab Rohani <sup>2</sup>, and Quan (Sophia) He <sup>3</sup>

<sup>1</sup> School of Chemical Engineering, East China University of Science and Technology, Shanghai 200237, China; yfpeng@ecust.edu.cn

<sup>2</sup> Department of Chemical and Biochemical Engineering, Western University, London, ON N6A 5B9, Canada; srohani@uwo.ca

<sup>3</sup> Department of Engineering, Faculty of Agriculture, Dalhousie University, Truro, NS B2N 5E3, Canada; quan.he@dal.ca

\* Correspondence: yfpeng@ecust.edu.cn; Tel: +86-21-64252345

**Table S1.** The Orthogonal Experiment Result for the Resolution of (R, S)-4-CIMA by (R)-(+)-BPA.

| Entry    | n4-CIMA:nBPA | T/°C  | V/ml  | d.e./%       | Yield/% | E/%  |
|----------|--------------|-------|-------|--------------|---------|------|
| 1        | 1: 1         | 25    | 10    | 95.4         | 78.1    | 74.5 |
| 2        | 1: 1         | 20    | 6     | 95.6         | 84.8    | 81.1 |
| 3        | 1: 1         | 15    | 8     | 94.8         | 88.9    | 84.3 |
| 4        | 1: 0.85      | 25    | 6     | 95.0         | 81.7    | 77.6 |
| 5        | 1: 0.85      | 20    | 8     | 96.4         | 80.3    | 77.4 |
| 6        | 1:0.85       | 15    | 10    | 97.9         | 79.9    | 78.2 |
| 7        | 1:0.70       | 25    | 8     | 96.8         | 70.8    | 68.5 |
| 8        | 1:0.70       | 20    | 10    | 95.4         | 71.9    | 68.6 |
| 9        | 1:0.70       | 15    | 6     | 95.0         | 79.9    | 75.9 |
| $X_{1j}$ | 71.00        | 78.20 | 79.47 | $X=76.23$    |         |      |
| $X_{2j}$ | 77.73        | 76.73 | 75.70 |              |         |      |
| $X_{3j}$ | 79.97        | 73.77 | 73.53 |              |         |      |
| $SS_j$   | 43.59        | 10.18 | 18.06 | $SS_T=71.83$ |         |      |

4-CIMA=0.005mol in all cases.

**Table S2.** Crystal Structure Data of (R)-(-)-4-CIMA·(R)-(+)-BPA and (S)-(+)-4-CIMA·(R)-(+)-BPA.

|                                 | (R)-(-)-4-CIMA·(R)-(+)-BPA                        | (S)-(+)-4-CIMA·(R)-(+)-BPA                        |
|---------------------------------|---------------------------------------------------|---------------------------------------------------|
| Empirical formula               | C <sub>23</sub> H <sub>24</sub> ClNO <sub>3</sub> | C <sub>23</sub> H <sub>24</sub> ClNO <sub>3</sub> |
| Formula weight(g/mol)           | 397.88                                            | 397.88                                            |
| Temperature(K)                  | 110                                               | 293(2)                                            |
| Wavelength(Å)                   | 1.54178                                           | 0.71073                                           |
| Crystal system                  | monoclinic                                        | Orthorhombic                                      |
| Space group                     | C2                                                | P2 <sub>1</sub> 2 <sub>1</sub> 2 <sub>1</sub>     |
| a(Å)                            | 17.783(5)                                         | 9.179(7)                                          |
| b(Å)                            | 9.6993(19)                                        | 14.046(11)                                        |
| c (Å)                           | 12.796(3)                                         | 16.222(12)                                        |
| α(°)                            | 90                                                | 90                                                |
| β(°)                            | 107.868(10)                                       | 90                                                |
| γ(°)                            | 90                                                | 90                                                |
| V(Å <sup>3</sup> )              | 2100.6(8)                                         | 2092(3)                                           |
| $D_{calc}$ (g/cm <sup>3</sup> ) | 1.258                                             | 1.264                                             |

| Z                                     | 4                            | 4                                |
|---------------------------------------|------------------------------|----------------------------------|
| Crystal size(mm)                      | 0.564×0.126×0.119            | 0.600 × 0.400 × 0.180            |
| Reflection collected                  | 34940                        | 10112                            |
| Goodness-of-fit on $F^2$              | 1.037                        | 0.829                            |
| Final $R$ indices( $I > 2\sigma(I)$ ) | $R_1=0.0359$ , $wR_2=0.0879$ | $R_1 = 0.0379$ , $wR_2 = 0.0693$ |
| $R$ indices(all data)                 | $R_1=0.0427$ , $wR_2=0.0915$ | $R_1 = 0.0718$ , $wR_2 = 0.0742$ |

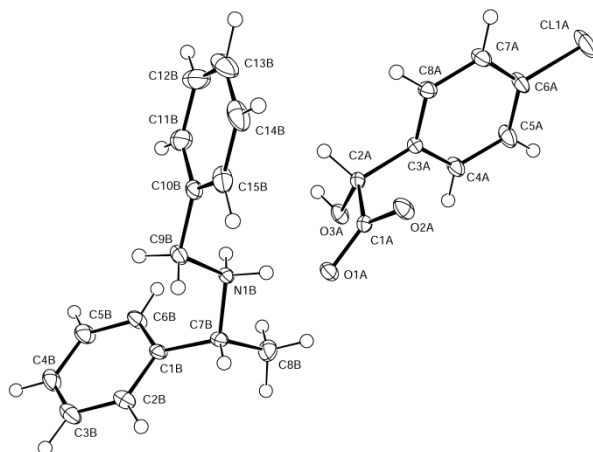

(a)

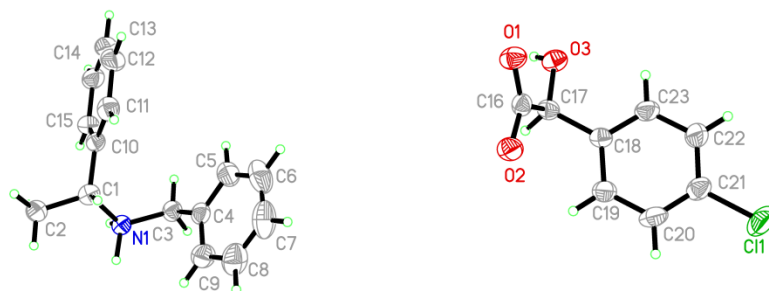

(b)

**Figure S1.** Atomic-numbering Schemes of (*R*)-(-)-4-CIMA·(*R*)-(+)-BPA (a) and (*S*)-(+)-4-CIMA·(*R*)-(+)-BPA (b)

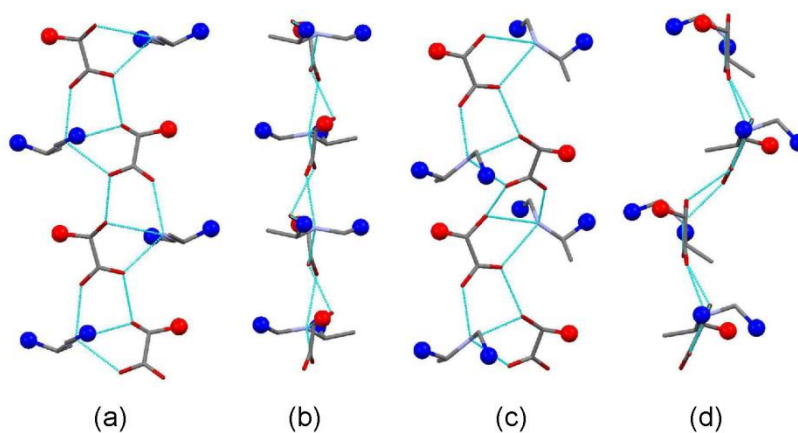

**Figure S2:** The H-bonding network in the less soluble salt (a and b) and more soluble salt (c and d). The red parts represent carboxylate anions of 4-CIMA and the blue parts represent ammonium cations of BPA

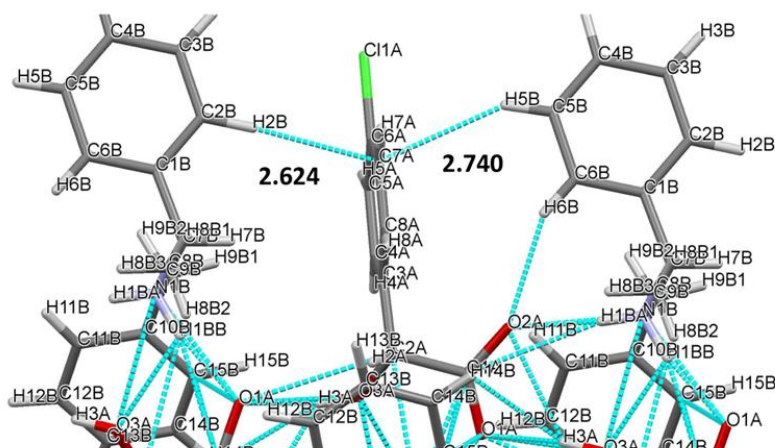

**Figure S3.** The CH/ $\pi$  interactions within hydrogen column of less soluble salt.

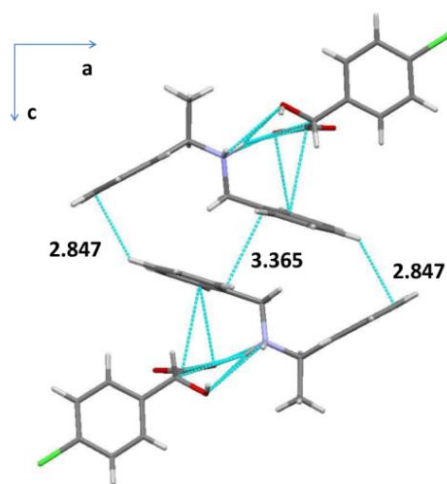

**Figure S4:** The CH/ $\pi$  interactions between adjacent hydrophobic layers of less soluble salt. Viewed from b-axis

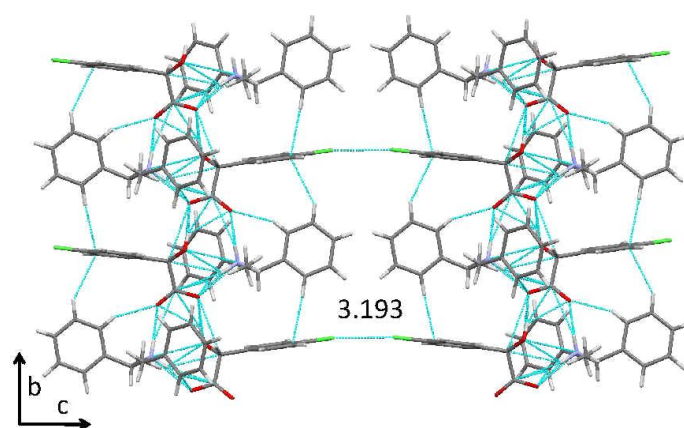

(a)

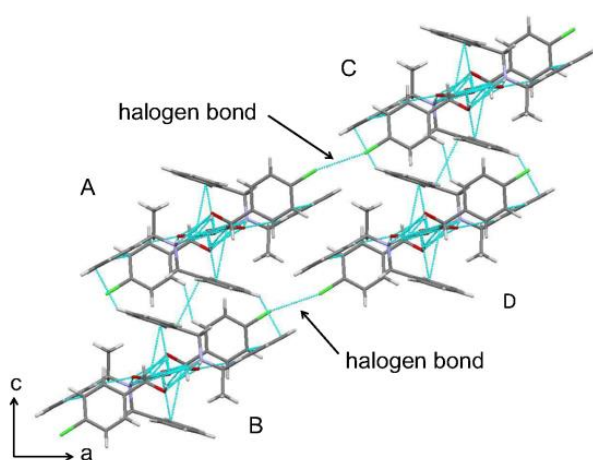

(b)

**Figure S5.** The Cl...Cl halogen bond between adjacent hydrogen bonding net work columns and the view of adjacent four columns from b-axis in the less soluble salt (a)viewed from a-axis; (b)viewed from b-axis

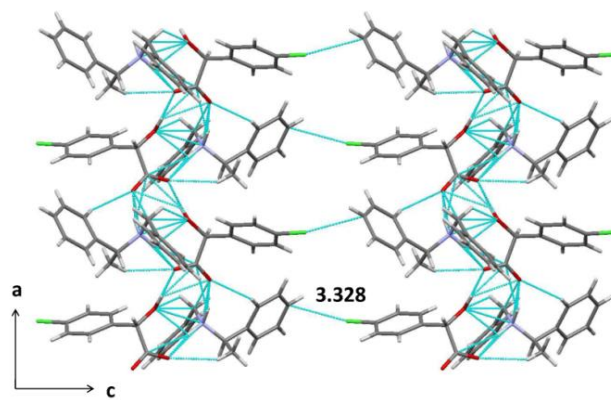

(a)

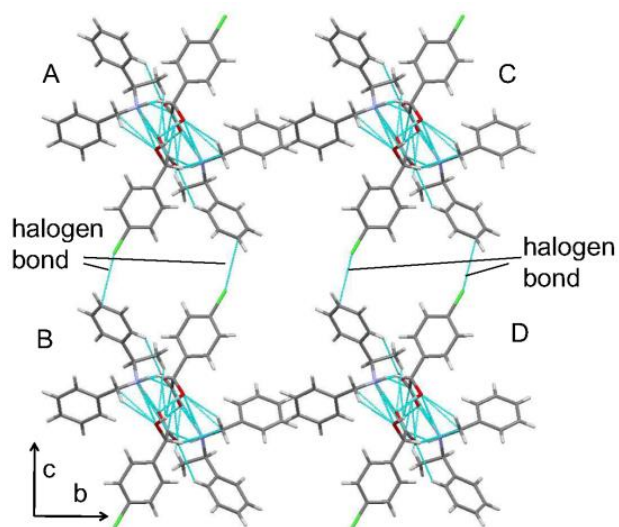

(b)

**Figure S6** The Cl/ $\pi$  halogen bonds between columns and the view of adjacent four columns from a-axis in the more soluble salt (a) viewed from b-axis; (b) viewed from a-axis

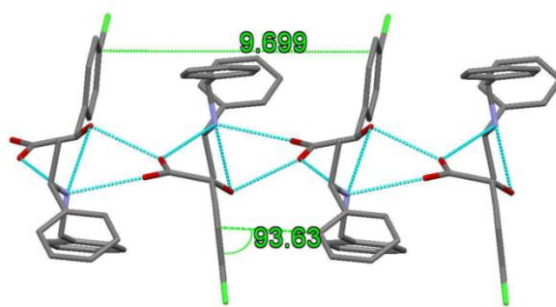

(a)

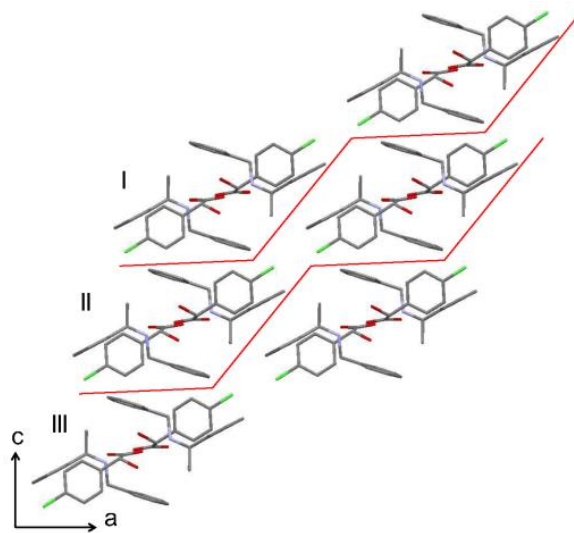

(b)

**Figure S7.** Packing mode of the less soluble salt in hydrophobic region;(a) The distance of benzene rings; (b) the packing mode of hydrophobic layers (viewed from b-axis)

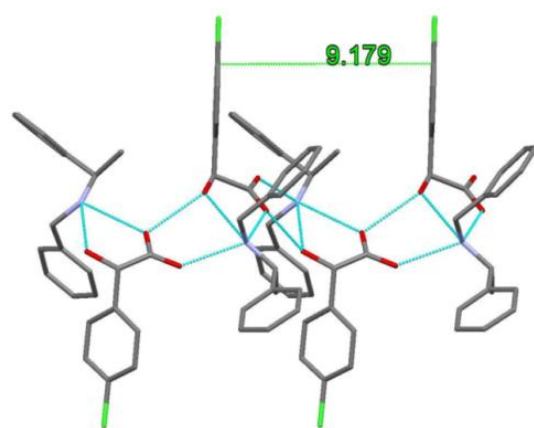

(a)

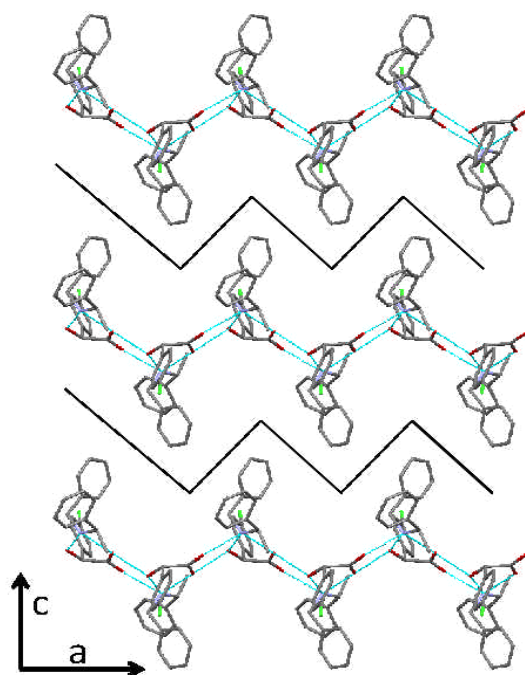

(b)

**Figure S8.** packing mode of the more soluble salt in hydrophobic region; a, The distance between benzene rings; b, the packing mode of hydrophobic layers (viewed from b-axis)
